# Supplementary material
Source: publisher figshare collection journal article supplement (https://geolsoc.figshare.com/ndownloader/files/14298980)
Supplement: Supplementary file 1 [file 14298980]

## Sheet: Sheet1
Ch. 4, Table S2 Volcaniclastic sandstones/siltstsone ICP-MS
Sample	N13 155	N13 155	NZ13-157	NZ13-158	N13 159	N13 174	N13 176	N14-96	N14-97		N13 223	N13 229	N13 232	N13 233	N13 234	N13 240	N13 241
Rock type		sandstone	sandstone	sandstone	sandstone	sandstone	sandstone	sandstone	sandstone		sandstone	siltstone	sandstone	sandstones	siltstone	sandstone	sandstone
Area	Redcliff stream	Redcliff stream	Redcliff stream	Redcliff stream	Redcliff stream	Princhester stream	Princhester stream	Elbow Ceeek area	Elbow Ceeek area		Grampian Reserve	Grampian Reserve	Grampian Reserve	Grampian Reserve	Grampian Reserve	Jickell's bridge, Maitai R.	Jickell's bridge, Maitai R.
Stratigraphy		Brunel Fm.	Brunel Fm.	Brunel Fm.	Brunel Fm.	Elbow Fm.	Elbow Fm.	Caravan Fm.	Caravan Fm.		Grampian Fm.	Grampian Fm.	Grampian Fm.	Grampian Fm.	Grampian Fm.	Grampian Fm.	Grampian Fm.
Region		Takitimu Mtns.	Takitimu Mtns.	Takitimu Mtns.	Takitimu Mtns.	Takitimu Mtns.	Takitimu Mtns.	Wairki Hills	Wairki Hills		Nelson region	Nelson region	Nelson region	Nelson region	Nelson region	Nelson region	Nelson region
GPS		S45 73016 E167 74447	S45 73016 E167 74447	S45 73016 E167 74447	S45 73016 E167 74447	S45 61264 E16791516	S45 61264 E16791516	E21 17603 N54 78243	E21 17603 N54 78243		S41 29504 E173 28566	S41 29440 E173 28706	S41 29504 E173 28566	S41 29504 E173 28566	S41 29504 E173 28566	S41 27459 E173 30687	S41 27518 E173 32181
Trace elements & REEEs
Ba	15	15	129	72	63	83	76	75	66		21	355	13	164	158	174	280
Be	1	1	2	2				2	1		1
Co	52	52	56	34.3	37.7	40.7	39.1	28.3	28		44	8.3	44.9	40.7	26.7	12.4	14.5
Cs	0.2	0.2	0.3	0.3	0.1	0.2	0.9	0.2	0.4		1	4.8	0.3	0.7	1.7	2.5	1.8
Ga	15.8	15.8	17.3	20.1	11.4	16.2	14.1	15.7	15.2		13.7	16	14.8	7.8	10.8	12.6	12.5
Hf	1.8	1.8	2.1	3.9	2.2	2	1.3	2.5	2.6		1.1	4.9	1.3	1.1	3.9	4.1	5.1
Nb	5.9	5.9	1.1	2.3	11.1	1.6	1.1	1.2	1.6		0.8	7.7	1.1	1	5.3	6.1	5.7
Rb	0.6	0.6	12.9	9.1	4.8	10.2	18.4	14.6	16.7		3.5	105.6	3.6	21.3	41.3	57.8	44.4
Sn		<1		1								3			2	2	2
Sr	148.9	148.9	427	279.9	317	349.4	325.1	831.3	364		255.2	275	389.2	401.2	248.8	248.5	308.7
Ta	10.2	10.2	2.1	1	3.3	1.5	1.1	0.2	0.1		1.9	0.9	1.5	1	2.2	1.6	1.8
Th	0.4	0.4	0.3	0.7	0.9	0.6	0.4	0.5	0.6		0.2	9.9	0.5	1.2	7.5	7.6	6.8
U	0.2	0.2	0.3	0.3	0.3	0.2	0.2	0.4	0.3		0.1	2.6	0.4	0.3	1.9	2	1.7
V	260	260	401	311	252	328	296	238	234		265	100	279	139	33	54	55
W	589.3	589.3	131.2	110.5	229.3	133.1	76.8	13.1	20.7		155	38.3	112.9	123.6	195.2	106.1	118.6
Zr	66.5	66.5	71.5	135.4	90.3	69.3	50.9	80.2	85.8		31.3	178	49.9	34.9	138.5	134.1	185
Y	15.4	15.4	20	32.9	18	19.2	16.8	21.9	21.6		13.8	26.6	16.7	10.6	19.5	21.1	20.6
La	6.6	6.6	6.6	9.5	12	7.3	5.6	6.8	7.6		3.2	26	4.8	8.1	17.7	20.4	20.2
Ce	15.3	15.3	15	26.9	25.5	17.2	14.3	16.2	18.8		7.9	56.4	11.7	12.5	38	41.9	44.8
Pr	1.97	1.97	2.25	3.69	3.02	2.45	1.89	2.41	2.74		1.11	6.14	1.63	1.74	4.38	4.71	4.59
Nd	9.2	9.2	11.2	18.3	12.9	13	9.4	11.7	12.7		5.3	24.1	8.8	7.7	15.3	18.9	18.7
Sm	2.3	2.3	3.07	5.03	2.9	3.39	2.44	3.13	3.48		1.96	5	2.48	1.98	3.46	3.69	3.85
Eu	0.95	0.95	1.15	1.67	1.04	1.17	0.88	1.08	1.15		0.74	1.13	0.75	0.42	0.6	0.67	0.79
Gd	2.62	2.62	3.62	5.66	3	3.61	2.73	3.72	3.61		2.04	4.77	2.81	2.02	3.43	3.97	3.75
Tb	0.45	0.45	0.63	1.01	0.53	0.61	0.49	0.54	0.61		0.41	0.84	0.5	0.31	0.51	0.65	0.59
Dy	2.76	2.76	3.56	5.75	3.03	3.42	3.22	3.7	3.87		2.12	4.68	3.03	1.96	3.64	4.02	3.69
Ho	0.59	0.59	0.77	1.18	0.67	0.78	0.58	0.76	0.78		0.53	1.04	0.72	0.35	0.67	0.77	0.72
Er	1.57	1.57	2.36	3.63	1.98	1.96	1.86	2.28	2.38		1.56	2.95	1.93	1.26	2.12	2.44	2.09
Tm	0.24	0.24	0.33	0.55	0.27	0.35	0.26	0.32	0.33		0.21	0.45	0.26	0.16	0.33	0.33	0.33
Yb	1.65	1.65	2.12	3.59	1.82	1.94	1.79	2.17	2.35		1.63	2.93	1.81	1.07	2.05	2.35	2.27
Lu	0.23	0.23	0.34	0.52	0.28	0.3	0.29	0.33	0.35		0.23	0.43	0.27	0.18	0.34	0.35	0.39
Eu/Eu*	1.18328	1.18328	1.05476	0.956983	1.07809	1.02262	1.04252	0.967743	0.992052		1.13154	0.70748	0.868685	0.642127	0.532532	0.535237	0.635713
Th/U		2	1	2.33333	3	3	2	1.25	2		2	3.80769	1.25	4	3.94737	3.8	4
